# Supplementary material for: Comparative efficacy and safety of glucagon-like peptide 1 receptor agonists for the treatment of type 2 diabetes: A network meta-analysis
Source: PubMed Central journal article supplement — Medicine (Baltimore). 2023 Jul 7;102(27):e34122. doi: 10.1097/MD.0000000000034122 (PMC10328610; doi:10.1097/md.0000000000034122), 2023-07-07
Supplement: medi-102-e34122-s001.pdf [file medi-102-e34122-s001.pdf]

**Comparison of efficacy and safety of GLP-1 RA for the Treatment of Type 2 Diabetes Mellitus:  
A Network Meta-analysis**

**Supplementary charts:**

**Table S1.** Strategy of literature retrieval.

| Element         | Criteria                                                                                                                                                                                                                 |
|-----------------|--------------------------------------------------------------------------------------------------------------------------------------------------------------------------------------------------------------------------|
| 1. Disease      | Contained one of these terms in any field: “diabetes mellitus” or “type 2 diabetes” or “type II diabetes” or “non-insulin dependent diabetes”.                                                                           |
| 2. Intervention | Met one of the criteria below.                                                                                                                                                                                           |
| a               | Contained one of these terms in any field: “glucagon like peptide 1 receptor agonist” or “glucagon-like peptide 1 receptor agonist” or “glucagon-like peptide 1 agonist” or “GLP-1 receptor agonist” or “GLP-1 agonist”. |
| b               | Contained one of these terms in any field: “Exenatide” or “Dulaglutide” or “Semaglutide” or “Loxenatide” or “PEX168”.                                                                                                    |
| 3. Intervention | Contained one of these terms in any field: Metformin.                                                                                                                                                                    |
| 4. Design       | Contained one of these terms in any field: “randomized controlled trial” (RCT) or “randomized controlled trial” or “randomized trial” or “randomized trial”.                                                             |
