# Supplementary material for: Comparative efficacy and safety of glucagon-like peptide 1 receptor agonists for the treatment of type 2 diabetes: A network meta-analysis
Source: PubMed Central journal article supplement — Medicine (Baltimore). 2023 Jul 7;102(27):e34122. doi: 10.1097/MD.0000000000034122 (PMC10328610; doi:10.1097/md.0000000000034122), 2023-07-07
Supplement: medi-102-e34122-s003.pdf [file medi-102-e34122-s003.pdf]

Figure S1b. Risk of bias summary: judgments from each study.

|                              | Random sequence generation (selection bias) | Allocation concealment (selection bias) | Blinding of participants and personnel (performance bias) | Blinding of outcome assessment (detection bias) | Incomplete outcome data (attrition bias) | Selective reporting (reporting bias) | Other bias |
|------------------------------|---------------------------------------------|-----------------------------------------|-----------------------------------------------------------|-------------------------------------------------|------------------------------------------|--------------------------------------|------------|
| CHEN (2016)                  | +                                           | +                                       | +                                                         | +                                               | +                                        | +                                    | +          |
| Davies (2017)                | +                                           | -                                       | +                                                         | +                                               | +                                        | +                                    | +          |
| Eli Lilly and Company (2019) | +                                           | ?                                       | +                                                         | ?                                               | +                                        | +                                    | +          |
| Eli Lilly and Company(2020)  | +                                           | ?                                       | +                                                         | ?                                               | +                                        | +                                    | +          |
| Gadde (2017)                 | +                                           | +                                       | +                                                         | +                                               | +                                        | +                                    | +          |
| Gao (2020)                   | +                                           | +                                       | +                                                         | +                                               | +                                        | +                                    | +          |
| Grunberger (2012)            | +                                           | ?                                       | ?                                                         | ?                                               | +                                        | +                                    | +          |
| Ji (2020)                    | +                                           | +                                       | +                                                         | ?                                               | +                                        | +                                    | +          |
| Juan (2021)                  | +                                           | ?                                       | +                                                         | ?                                               | +                                        | +                                    | +          |
| KIM (2007)                   | +                                           | +                                       | +                                                         | ?                                               | +                                        | +                                    | +          |
| Pratley (2018)               | ?                                           | -                                       | ?                                                         | +                                               | +                                        | +                                    | +          |
| Umpierrez (2014)             | +                                           | ?                                       | ?                                                         | ?                                               | +                                        | +                                    | +          |
