# Supplementary material for: Comparative efficacy and safety of glucagon-like peptide 1 receptor agonists for the treatment of type 2 diabetes: A network meta-analysis
Source: PubMed Central journal article supplement — Medicine (Baltimore). 2023 Jul 7;102(27):e34122. doi: 10.1097/MD.0000000000034122 (PMC10328610; doi:10.1097/md.0000000000034122), 2023-07-07
Supplement: medi-102-e34122-s004.pdf [file medi-102-e34122-s004.pdf]

Figure S2. Results of network meta-analysis of the clinical efficacy of ten GLP-1RAs. Data in each cell are hazard or odds ratios (95% credible intervals) for the comparison of row-defining treatment versus column-defining treatment. Significant results are marked \*. Sema=Semaglutide; Dula=Dulaglutide; Exe= Exenatide.

|               |               |               |               |               |               |               |               |               |               |         |  |  |  |  |  |  |  |  |  |  |  |
|---------------|---------------|---------------|---------------|---------------|---------------|---------------|---------------|---------------|---------------|---------|--|--|--|--|--|--|--|--|--|--|--|
| Sema2.0mg     |               |               |               |               |               |               |               |               |               |         |  |  |  |  |  |  |  |  |  |  |  |
| -0.20*        |               |               |               |               |               |               |               |               |               |         |  |  |  |  |  |  |  |  |  |  |  |
| (-0.78,0.38)  | Sema1.0mg     |               |               |               |               |               |               |               |               |         |  |  |  |  |  |  |  |  |  |  |  |
| -0.73         | -0.53         |               |               |               |               |               |               |               |               |         |  |  |  |  |  |  |  |  |  |  |  |
| (-1.56,0.10)  | (-1.13,0.07)  | Dula4.5mg     |               |               |               |               |               |               |               |         |  |  |  |  |  |  |  |  |  |  |  |
| -0.64         | -0.44         | 0.09          |               |               |               |               |               |               |               |         |  |  |  |  |  |  |  |  |  |  |  |
| (-1.78,0.50)  | (-1.42,0.55)  | (-0.97,1.15)  | Exe2.0mg      |               |               |               |               |               |               |         |  |  |  |  |  |  |  |  |  |  |  |
| -0.84         | -0.64*        | -0.11         | -0.21         |               |               |               |               |               |               |         |  |  |  |  |  |  |  |  |  |  |  |
| (-1.54,-0.15) | (-1.04,-0.25) | (-0.73,0.50)  | (-1.23,0.82)  | Sema0.5mg     |               |               |               |               |               |         |  |  |  |  |  |  |  |  |  |  |  |
| -0.97         | -0.77         | -0.23         | -0.33         | -0.12*        |               |               |               |               |               |         |  |  |  |  |  |  |  |  |  |  |  |
| (-1.79,-0.14) | (-1.35,-0.18) | (-0.65,0.18)  | (-1.38,0.75)  | (-0.73,0.49)  | Dula3.0mg     |               |               |               |               |         |  |  |  |  |  |  |  |  |  |  |  |
| -1.00*        | -0.80         | -0.27         | -0.36         | -0.16*        | -0.04         |               |               |               |               |         |  |  |  |  |  |  |  |  |  |  |  |
| (-1.71,-0.29) | (-1.22,-0.39) | (-0.70,0.16)  | (-1.35,0.62)  | (-0.60,0.28)  | (-0.46,0.38)  | Dula1.5mg     |               |               |               |         |  |  |  |  |  |  |  |  |  |  |  |
| -1.26*        | -1.06         | -0.53         | -0.63         | -0.42*        | -0.30         | -0.26         |               |               |               |         |  |  |  |  |  |  |  |  |  |  |  |
| (-1.99,-0.54) | (-1.50,-0.63) | (-1.06,-0.01) | (-1.64,0.39)  | (-0.87,0.04)  | (-0.82,0.22)  | (-0.58,0.05)  | Dula0.75mg    |               |               |         |  |  |  |  |  |  |  |  |  |  |  |
| -1.55*        | -1.35         | -0.82         | -0.92         | -0.71*        | -0.59         | -0.55         | -0.29         |               |               |         |  |  |  |  |  |  |  |  |  |  |  |
| (-2.52,-0.59) | (-2.13,-0.58) | (-1.70,0.06)  | (-1.95,0.12)  | (-1.54,0.12)  | (-1.46,0.28)  | (-1.33,0.23)  | (-1.11,0.53)  | PEX168200ug   |               |         |  |  |  |  |  |  |  |  |  |  |  |
| -1.64*        | -1.44         | -0.91         | -1.01         | -0.80*        | -0.68         | -0.64         | -0.38         | -0.09         |               |         |  |  |  |  |  |  |  |  |  |  |  |
| (-2.61,-0.68) | (-2.22,-0.67) | (-1.79,-0.04) | (-2.04,0.03)  | (-1.63,0.03)  | (-1.55,0.19)  | (-1.42,0.14)  | (-1.20,0.44)  | (-0.66,0.48)  | PEX168100ug   |         |  |  |  |  |  |  |  |  |  |  |  |
| -2.71*        | -2.51*        | -1.98*        | -2.07*        | -1.87*        | -1.75*        | -1.71*        | -1.45*        | -1.16*        | -1.07*        |         |  |  |  |  |  |  |  |  |  |  |  |
| (-3.46,-1.96) | (-3.00,-2.02) | (-2.58,-1.38) | (-2.93,-1.22) | (-2.43,-1.30) | (-2.33,-1.16) | (-2.18,-1.24) | (-1.98,-0.91) | (-1.76,-0.56) | (-1.67,-0.46) | Placebo |  |  |  |  |  |  |  |  |  |  |  |

interventions
  fasting blood glucose
