# Supplementary figures and images for: Comparative efficacy and safety of glucagon-like peptide 1 receptor agonists for the treatment of type 2 diabetes: A network meta-analysis
Source: PubMed Central journal article supplement — Medicine (Baltimore). 2023 Jul 7;102(27):e34122. doi: 10.1097/MD.0000000000034122 (PMC10328610; doi:10.1097/md.0000000000034122), 2023-07-07

Figure S1a. Risk-of-bias graph of included clinical trials.

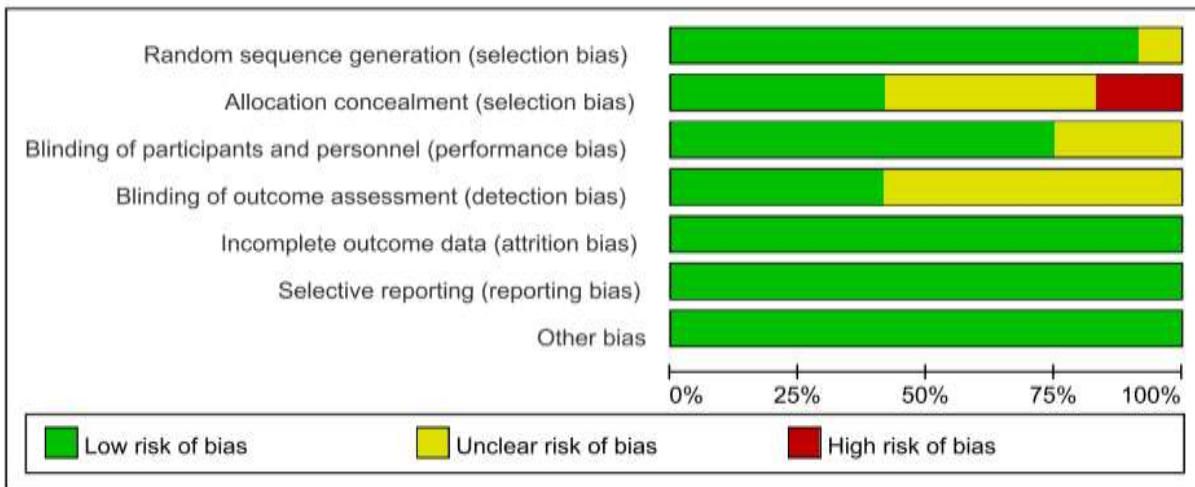

Supplement: medi-102-e34122-s002.pdf [file medi-102-e34122-s002.pdf]

Figure S3. Funnel plots.

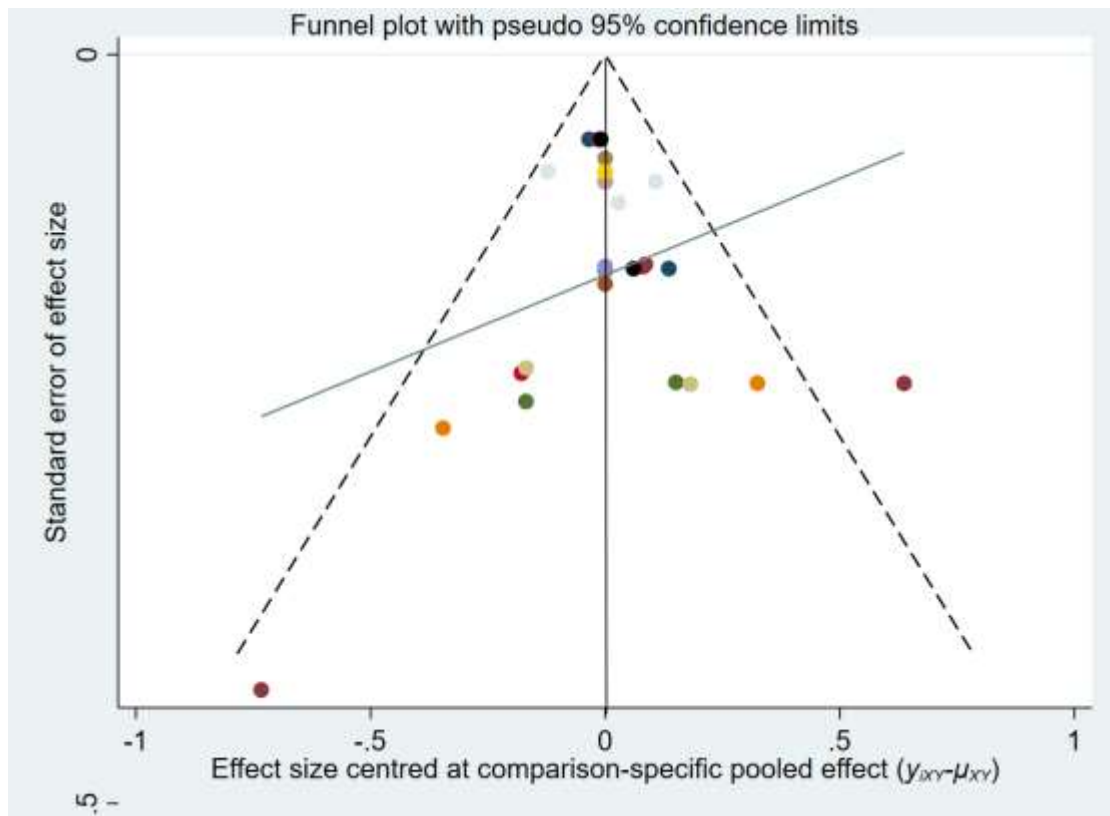

Supplement: medi-102-e34122-s005.pdf [file medi-102-e34122-s005.pdf]
